# Supplementary material for: Genetic analysis identifies molecular systems and biological pathways associated with household income
Source: bioRxiv or medRxiv preprint supplement (doi:10.1101/573691), 2019-03-12

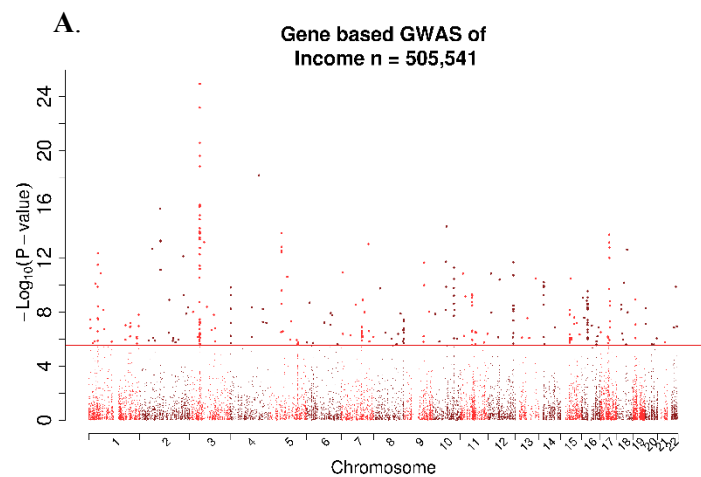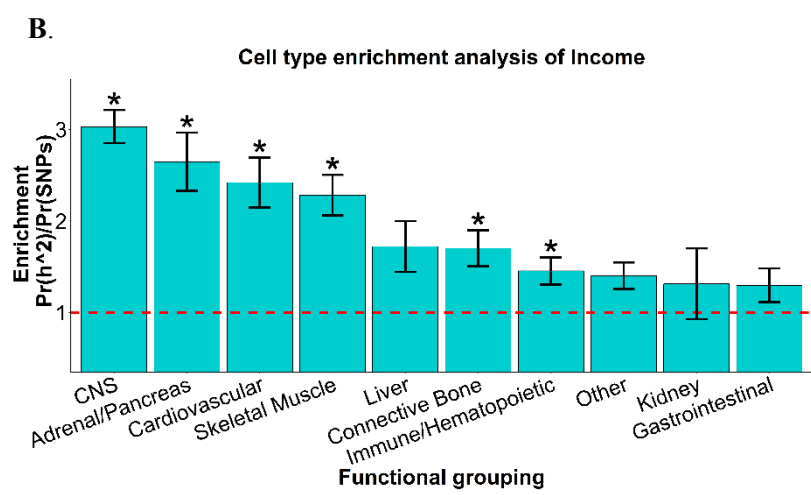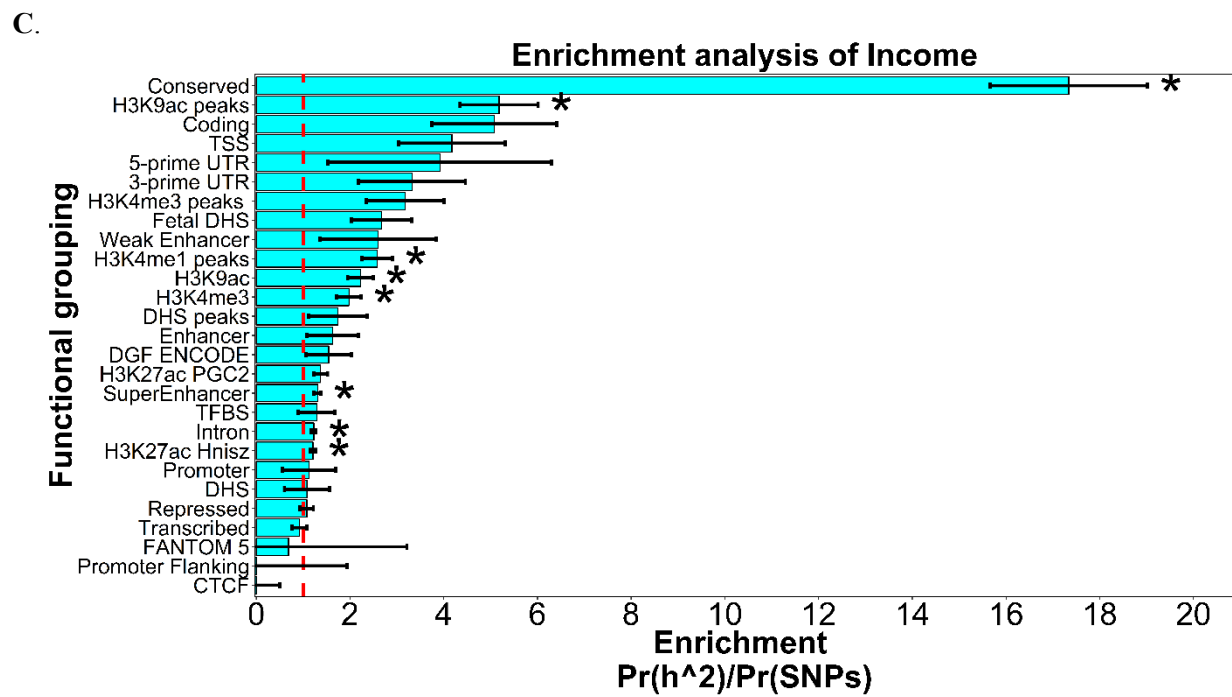

Supplement: Supplementary file [file media-2.pdf]
